# Supplementary material
Source: MDPI journal article supplement (https://www.mdpi.com/2076-3263/11/6/254)
Supplement: s1 [file s1]

## ***Supporting Information for***

# **Seismicity and the State of Stress in the Dezful Embayment, Zagros Fold and Thrust Belt**

**Ali Yaghoubi<sup>\*1</sup>, SeyedBijan Mahbaz<sup>1, 2</sup>, Maurice B. Dusseault<sup>1, 2</sup>, Yuri**

**Leonenko<sup>1, 2, 3</sup>**

<sup>1</sup> Department of Earth and Environmental Sciences, University of Waterloo, Waterloo, ON  
N2L 3G1, Canada

<sup>2</sup> Waterloo Institute for Sustainable Energy (WISE), University of Waterloo, Waterloo, ON  
N2L 3G1, Canada

<sup>3</sup> Department of Geography and Environmental Management, University of Waterloo, ON  
N2L 3G1, Canada

\* Correspondence: ali.yaghoubi@uwaterloo.ca;

### **Contents of this file**

**Figures S1 to S6**

**Table S1, and Table S2**

### **Introduction**

Five supplementary figures and three tables are presented here as supporting information. Figure S1 illustrates the stratigraphy column of the Dezful Embayment, and Figure S2 shows the mud weight and direct pore pressures data vs the depth of several wells drilled in the Dezful Embayment. The figure also shows that the Gachsaran Formation is a major pressure step when sedimentary formations in the Dezful Embayment are drilled. It is worth pointing out that Figure S2 shows a typical and general pore pressure variation with depth in the sedimentary cover. Figure S3 provides one example of the depths, and orientations of borehole breakouts plus their frequency in CK-9 and LL-29. Figures S5 and S6 show the result of stress inversion for 108 focal mechanisms using the Matlab code developed by Martines-Garzon et al. (2014). Table S3 includes earthquake source parameters used for stress determination and the tectonic regime in the Dezful Embayment of the ZFTB. The table presents seismically maximum horizontal stress ( $S_{Hmax}$ ) orientations, stress regimes ( $A_\phi$ ) calculated using Simpson's (1997) approach, as well as two nodal planes and other source parameters of the

earthquakes. The preferred nodal plane for each earthquake focal mechanism is highlighted in each row.

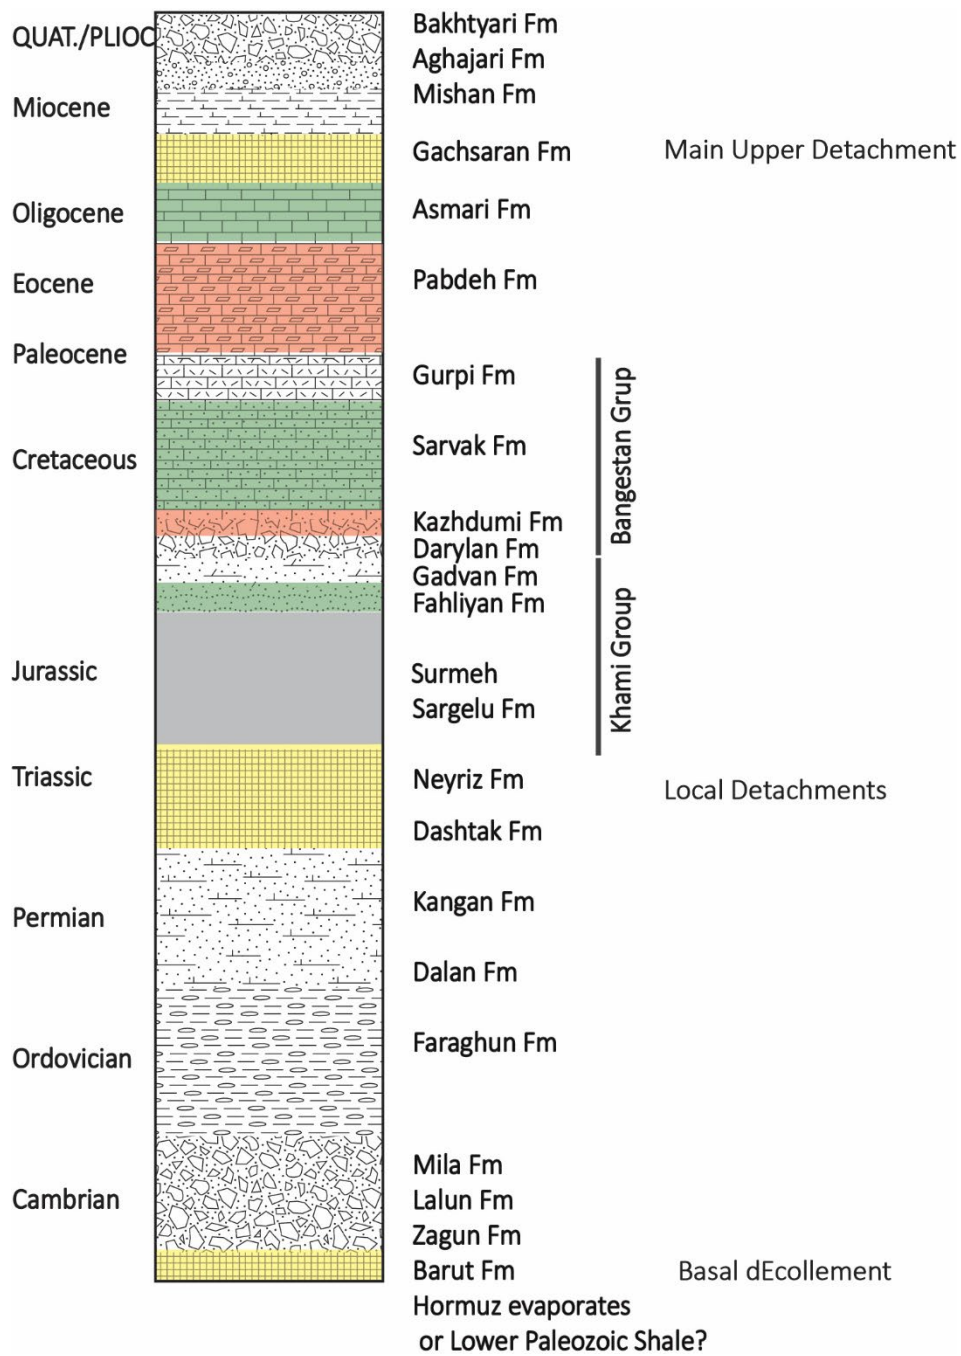

**Figure S1.** Stratigraphy column, source rocks, and reservoir formations for the Dezful Embayment. The main detachment rocks are indicated in yellow, reservoir rocks in green, and main source rocks in red (modified from Sherkati and Letouzey [1])

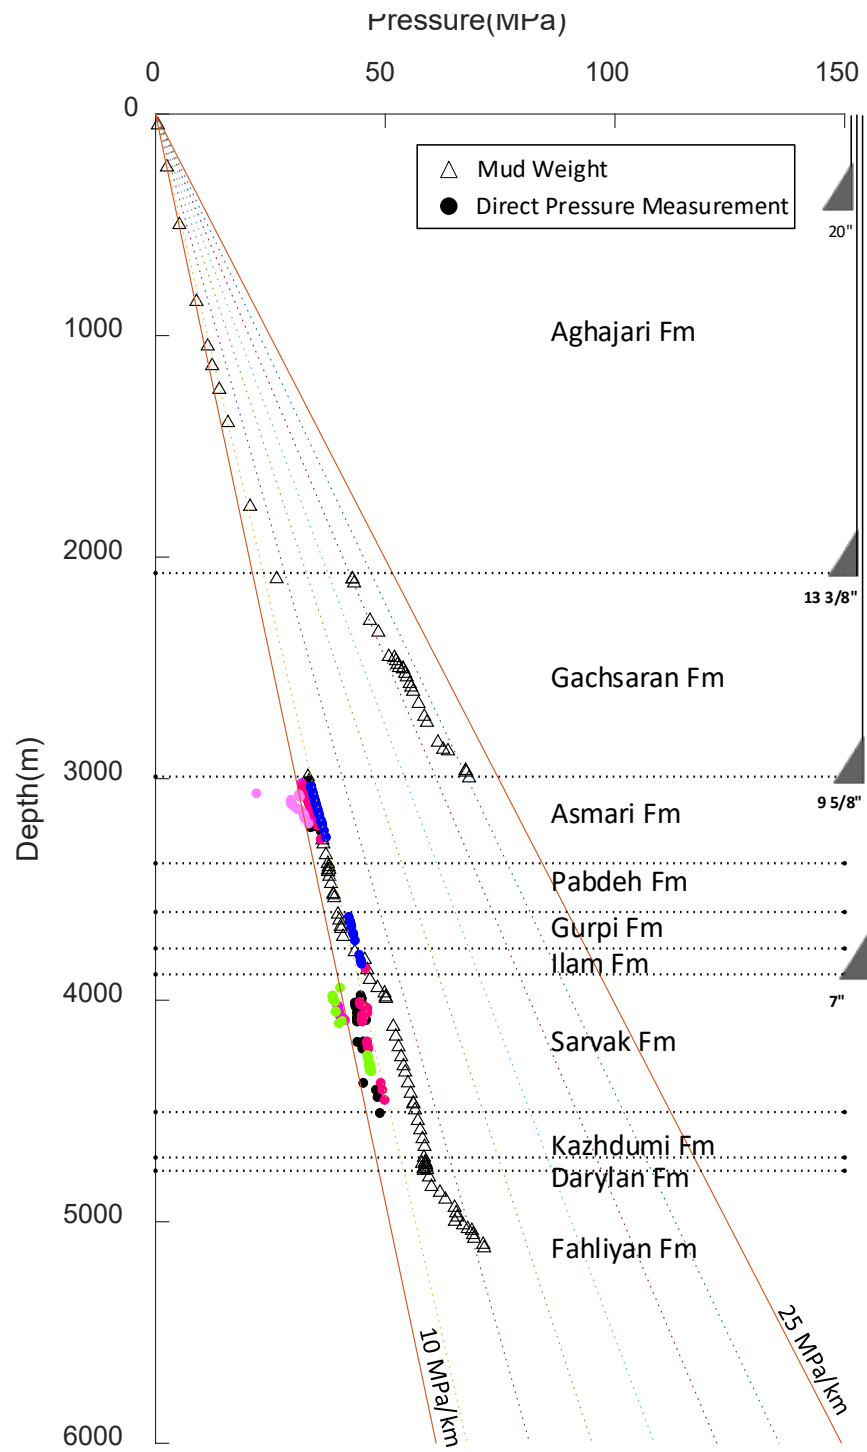

**Figure S2.** A typical mud weight profile from several wells drilled in the Dezful Embayment. Extremely high pore pressures are observed in the Gachsaran (Fars) Formation, whereas in the formations below and above, there is slightly higher than hydrostatic pressure. The colored dots

represent direct pore pressure measurements at different oil fields in the Dezful Embayment.

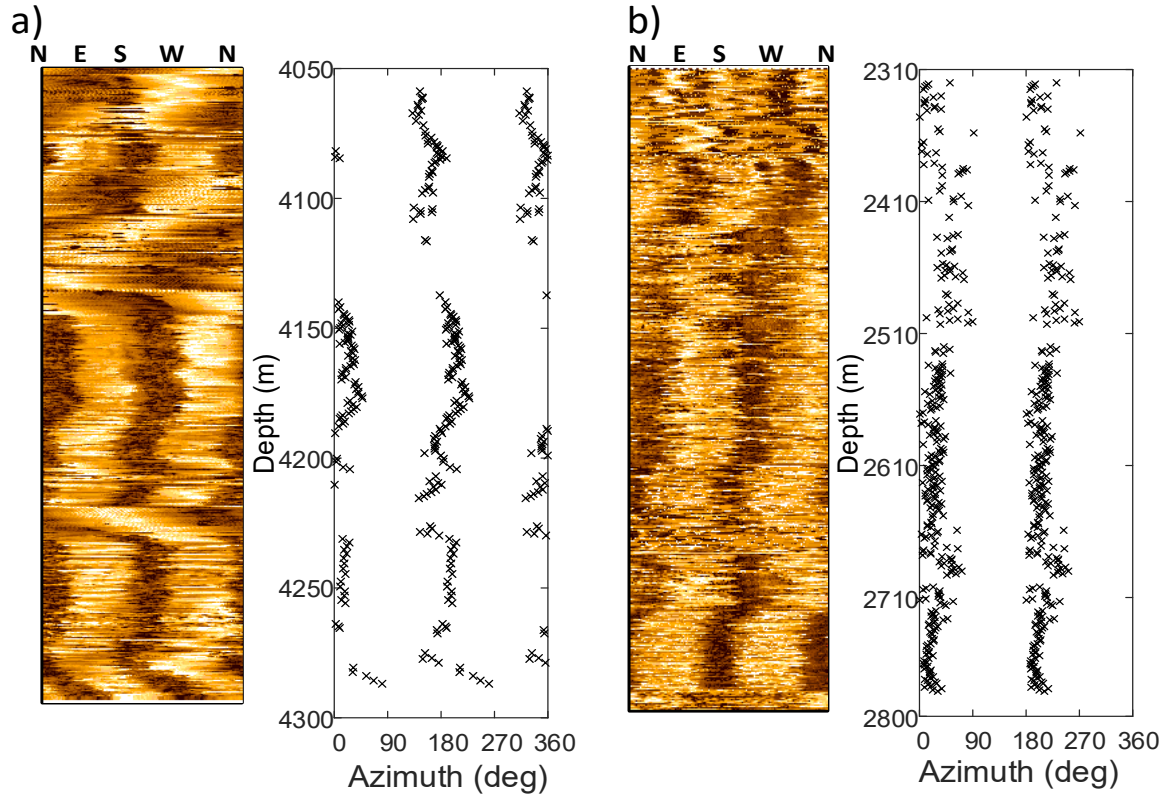

**Figure S3.** Ultrasonic image logs of a) CK-9 and b) LL-29 along with depth juxtaposed with observations of breakout orientations (minimum principal stress). Breakout orientations terminated abruptly, and then gradually rotated at 4110 m, 4221 m, 4242 m, and 4272 m in CK-9. The same pattern occurred in LL-29, with anomalies in breakout orientation observed at 2510 m and 2695 m.

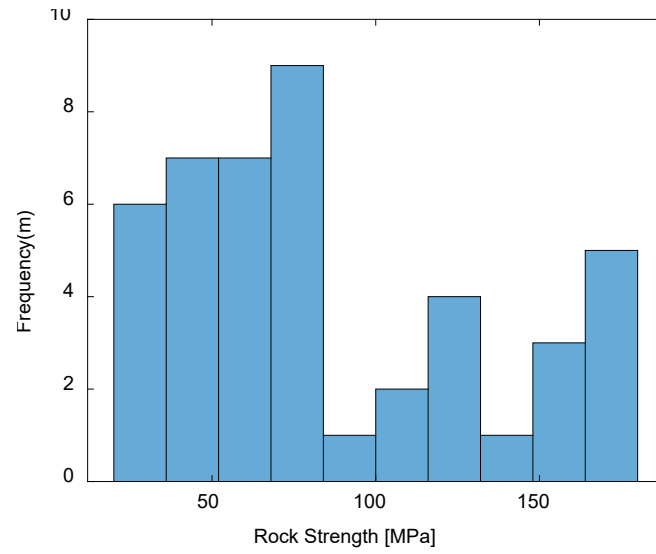

**Figure S4:** The uniaxial compressive rock strength (UCS) histogram of limestone in the Sarvak and Asmari Formations of the Kupal field (Najibi, *et al.* [2])



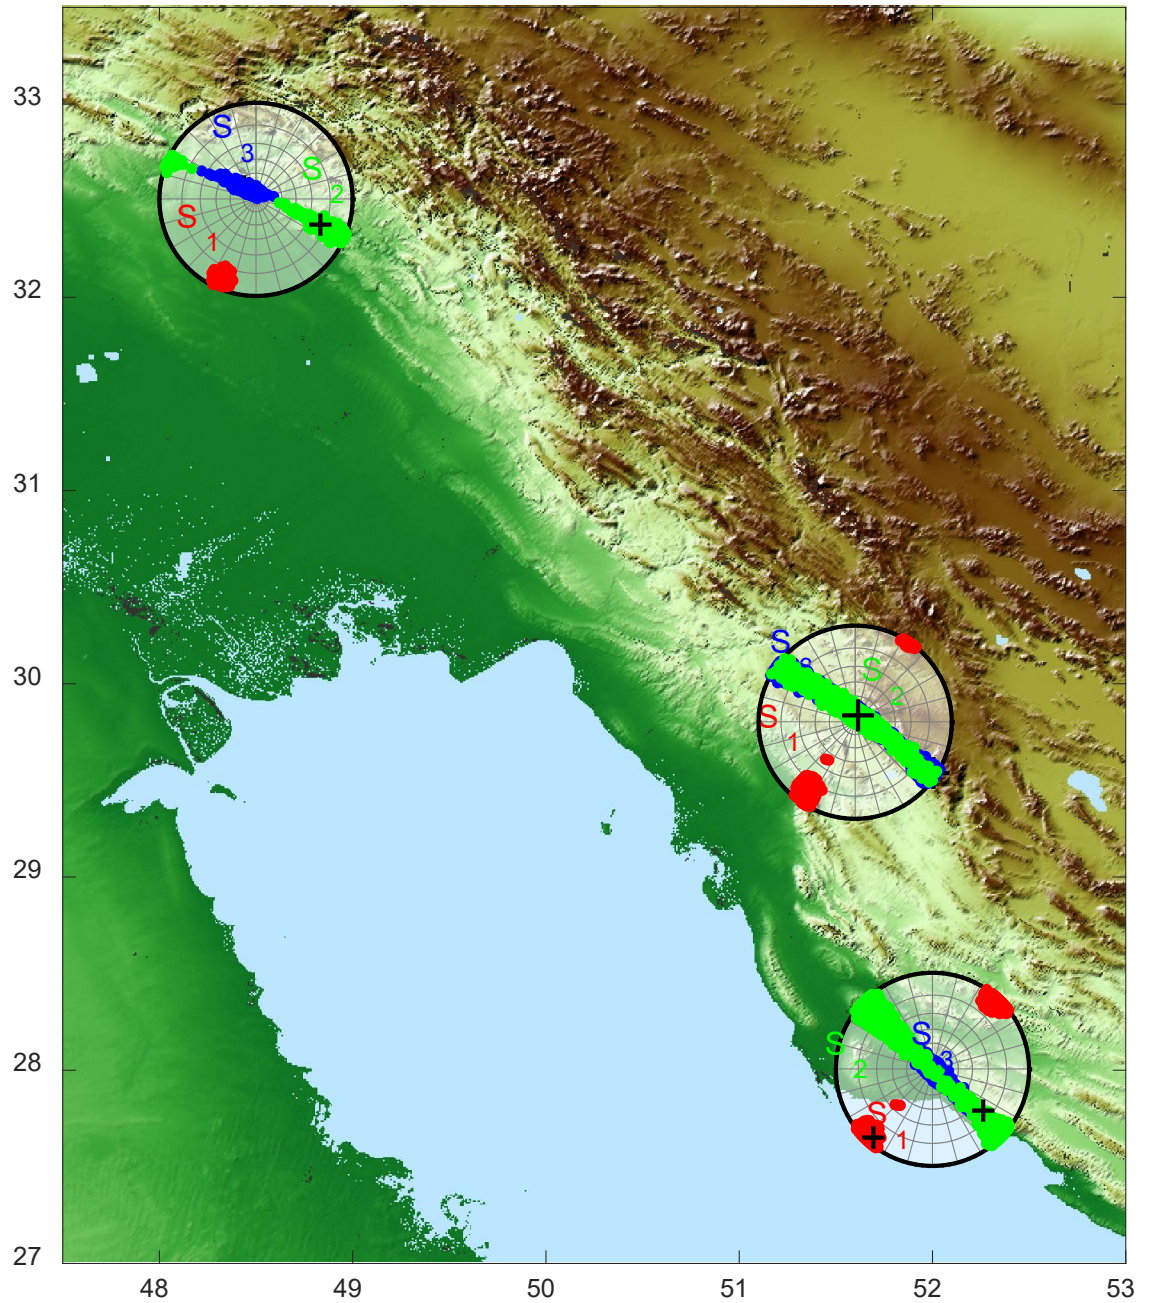

**Figure S5.** The result of stress inversion of focal mechanisms using the approach developed by Martines-Garzon et al. (2014) in the northern, southern, and around Kazrun fault system (middle) in the Dezful Embayment. Lower-hemisphere stereonets show the distributions of the principal stress orientations (S1-red, S2-green, S3-blue). The "+" symbol presents the best fit of principal stress orientations and colored dots are the 95% confidence of each orientation.

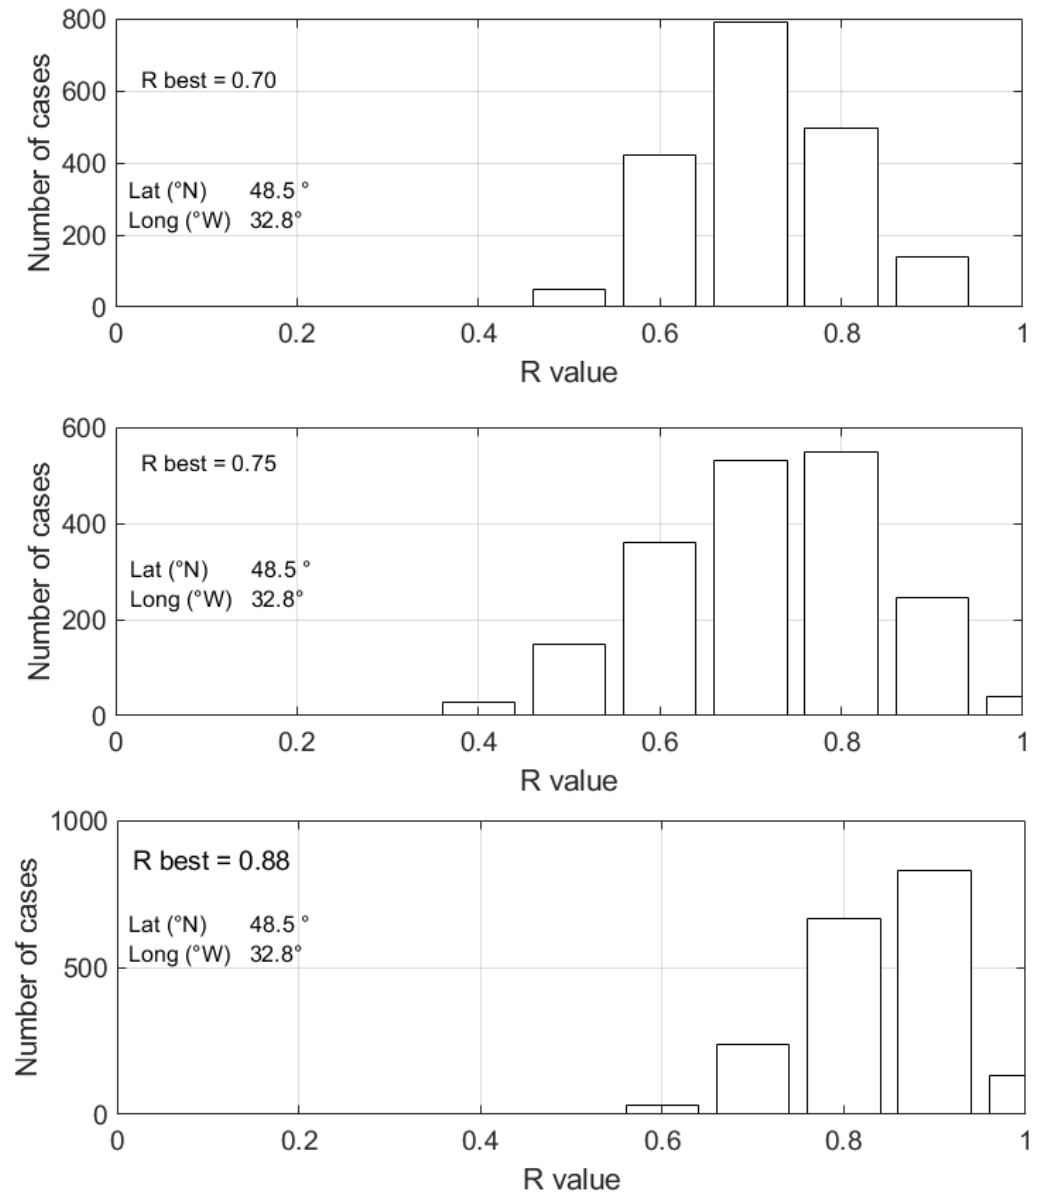

**Figure S6.** Histogram of R-value ( $1-\phi$ ) from the inversion of focal mechanism within the 95% confidence region in the northern (top), southern (middle), and around Kazrun fault system (bottom). Latitude and longitude in each subplot represent the centroid of the corresponding earthquake group.



**Table S1.** Detailed drilling information on sidetracks of well P-7.

| ITEM              | SD-1    | SD-2    |
|-------------------|---------|---------|
| KOP               | 3928 m  | 3899 m  |
| Azimuth           | 2050    | 2920    |
| Final Inclination | 900     | 900     |
| Duration (Day)    | 20 Days | 15 Days |
| Mud Weight        | 70 pcf  | 63 pcf  |
| Drilled Meter     | 212 m   | 711m    |
| Mud Type          | OBM     | OBM     |
| MD                | 4140 m  | 4610 m  |
| TVD               | 4025 m  | 4018m   |
| Hole Size         | 6 1/8"  | 6 1/8"  |
| Formation         | Sarvak  | Sarvak  |

**Table S2.** Earthquake source parameters used for stress determination and the tectonic regime in the ZFTB of the Dezful Embayment. The columns are: year, month, day, origin time (hr: min), latitude, longitude, depth, strike, dip, rake (nodal plane 1), strike, dip, rake (nodal plane 2), Paxis and Taxis and the result of calculated  $A_{\phi}$ .

| Date      | Lat.  | Lon.  | Strike     | Dip      | Rake      | Depth | Mw  | Regime | S <sub>Hmax</sub> | A <sub>φ</sub> | Reference                        |
|-----------|-------|-------|------------|----------|-----------|-------|-----|--------|-------------------|----------------|----------------------------------|
| 1968 6 23 | 29.74 | 51.25 | 136<br>319 | 45<br>45 | 88<br>92  | 9     | 5.5 | TF     | 47                | 2.25           | Baker, <i>et al.</i> [3]         |
| 1971 4 6  | 29.79 | 51.89 | 62<br>332  | 79<br>88 | 2<br>169  | 6     | 5.2 | SS     | 16                | 1.57           | Baker, Jackson and Priestley [3] |
| 1972 6 12 | 33.04 | 46.27 | 114<br>306 | 56<br>35 | 83<br>100 | 11    | 5   | TF     | 29                | 2.23           | Ni and Barazangi [4]             |
| 1972 6 14 | 33.03 | 46.13 | 198<br>65  | 40<br>60 | 51<br>118 | 10    | 5.3 | TF     | 135               | 2.24           | Jackson and McKenzie [5]         |
| 1972 7 2  | 30.06 | 50.85 | 132<br>312 | 64<br>26 | 90<br>90  | 9     | 5.3 | TF     | 42                | 3.00           | Ni and Barazangi [4]             |
| 1976 4 22 | 28.68 | 52.12 | 312<br>148 | 52<br>39 | 80<br>103 | 7     | 5.7 | TF     | 49                | 2.12           | Ni and Barazangi [4]             |
| 1976 11 7 | 33.19 | 47.93 | 138<br>269 | 58<br>43 | 121<br>51 | 10    | 4.8 | TF     | 26                | 2.19           | Jackson and McKenzie [5]         |
| 1977 4 6  | 31.96 | 50.65 | 112<br>228 | 64<br>48 | 132<br>36 | 6     | 5.9 | TF     | 173               | 2.24           | Baker, Jackson and Priestley [3] |
| 1977 4 26 | 32.64 | 48.91 | 293<br>110 | 29<br>61 | 93<br>88  | 20    | 5.5 | TF     | 21                | 2.29           | Maggi, <i>et al.</i> [6]         |
| 1977 6 5  | 32.62 | 48.09 | 293        | 34       | 91        | 12    | 6.1 | TF     | 22                | 2.31           | Jackson and Fitch [7]            |

| Date |    |    | Lat.  | Lon.  | Strike | Dip | Rake | Depth | Mw  | Regime | S <sub>Hmax</sub> | A <sub>φ</sub> | Reference                               |
|------|----|----|-------|-------|--------|-----|------|-------|-----|--------|-------------------|----------------|-----------------------------------------|
|      |    |    |       |       | 112    | 56  | 89   |       |     |        |                   |                |                                         |
| 1980 | 10 | 19 | 32.70 | 48.57 | 327    | 19  | 120  | 17    | 5.6 | TF     | 33                | 2.61           | Maggi, Jackson, Priestley and Baker [6] |
|      |    |    |       |       | 116    | 74  | 80   |       |     |        |                   |                |                                         |
| 1983 | 5  | 28 | 32.59 | 48.58 | 314    | 38  | 113  | 8     | 5.5 | TF     | 28                | 2.18           | Ni and Barazangi [4]                    |
|      |    |    |       |       | 106    | 55  | 73   |       |     |        |                   |                |                                         |
| 1986 | 7  | 12 | 29.91 | 51.56 | 4      | 73  | -159 | 4±3   | 5.5 | SS     | 45                | 1.06           | Baker, Jackson and Priestley [3]        |
|      |    |    |       |       | 268    | 70  | -18  |       |     |        |                   |                |                                         |
| 1986 | 12 | 20 | 29.90 | 51.58 | 344    | 65  | 163  | 8±3   | 5.3 | SS     | 31                | 1.82           | Baker, Jackson and Priestley [3]        |
|      |    |    |       |       | 81     | 75  | 26   |       |     |        |                   |                |                                         |
| 1988 | 8  | 11 | 29.88 | 51.66 | 350    | 82  | -166 | 9±3   | 5.8 | SS     | 33                | 1.20           | Baker, Jackson and Priestley [3]        |
|      |    |    |       |       | 258    | 76  | -8   |       |     |        |                   |                |                                         |
| 1988 | 8  | 11 | 29.94 | 51.58 | 3      | 69  | -175 | 7±3   | 5.5 | SS     | 49                | 1.35           | Baker, Jackson and Priestley [3]        |
|      |    |    |       |       | 271    | 85  | -21  |       |     |        |                   |                |                                         |
| 1988 | 8  | 30 | 29.95 | 51.72 | 242    | 57  | 12   | 16    | 5.1 | SS     | 15                | 1.31           | Maggi, Jackson, Priestley and Baker [6] |
|      |    |    |       |       | 337    | 82  | -147 |       |     |        |                   |                |                                         |
| 1988 | 12 | 6  | 29.89 | 51.63 | 357    | 74  | 198  | 10    | 5.6 | SS     | 39                | 1.02           | Baker, Jackson and Priestley [3]        |
|      |    |    |       |       | 262    | 73  | -17  |       |     |        |                   |                |                                         |
| 1991 | 11 | 4  | 30.69 | 50.25 | 135    | 80  | 78   | 5     | 5.8 | TF     | 55                | 2.78           | Talebian and Jackson [8]                |
|      |    |    |       |       | 6      | 16  | 140  |       |     |        |                   |                |                                         |
| 1993 | 6  | 22 | 30.18 | 50.83 | 301    | 44  | 65   | 5     | 5.2 | TF     | 48                | 2.10           | Maggi, Jackson, Priestley and Baker [6] |
|      |    |    |       |       | 154    | 51  | 112  |       |     |        |                   |                |                                         |
| 1994 | 3  | 29 | 29.20 | 51.36 | 334    | 40  | 104  | 7     | 5.1 | TF     | 54                | 2.09           | Talebian and Jackson [8]                |
|      |    |    |       |       | 136    | 51  | 79   |       |     |        |                   |                |                                         |
| 1994 | 7  | 31 | 32.68 | 48.42 | 288    | 17  | 90   | 14    | 5.5 | TF     | 18                | 3.00           | Priestley, <i>et al.</i> [9]            |
|      |    |    |       |       | 108    | 73  | 90   |       |     |        |                   |                |                                         |
| 1995 | 4  | 22 | 30.97 | 49.93 | 121    | 61  | 92   | 14    | 5.1 | TF     | 30                | 2.06           | Talebian and Jackson [8]                |
|      |    |    |       |       | 297    | 29  | 86   |       |     |        |                   |                |                                         |
| 1998 | 6  | 15 | 31.60 | 50.84 | 78     | 68  | 75   | 5     | 5   | TF     | 179               | 2.48           | Talebian and Jackson [8]                |
|      |    |    |       |       | 294    | 26  | 123  |       |     |        |                   |                |                                         |
| 1998 | 10 | 4  | 33.30 | 47.22 | 111    | 37  | 92   | 9     | 5.2 | TF     | 20                | 2.46           | Talebian and Jackson [8]                |
|      |    |    |       |       | 288    | 53  | 88   |       |     |        |                   |                |                                         |
| 1998 | 10 | 5  | 33.28 | 47.26 | 290    | 51  | 84   | 7     | 5.3 | TF     | 24                | 2.11           | Talebian and Jackson [8]                |
|      |    |    |       |       | 119    | 39  | 97   |       |     |        |                   |                |                                         |
| 1999 | 5  | 6  | 29.52 | 51.91 | 49     | 77  | -12  | 7     | 6.1 | SS     | 5                 | 1.03           | Talebian and Jackson [8]                |
|      |    |    |       |       | 142    | 78  | -167 |       |     |        |                   |                |                                         |
| 1999 | 10 | 31 | 29.37 | 51.85 | 117    | 34  | 67   | 5     | 5.2 | TF     | 43                | 2.30           | Adams, <i>et al.</i> [10]               |

| Date |    |    | Lat.  | Lon.  | Strike     | Dip      | Rake       | Depth | Mw  | Regime | S <sub>Hmax</sub> | A <sub>φ</sub> | Reference                                         |
|------|----|----|-------|-------|------------|----------|------------|-------|-----|--------|-------------------|----------------|---------------------------------------------------|
|      |    |    |       |       | 324        | 59       | 105        |       |     |        |                   |                |                                                   |
| 2000 | 5  | 3  | 29.56 | 50.81 | 292<br>152 | 26<br>70 | 53<br>106  | 5     | 5.1 | TF     | 49                | 2.55           | Talebian and Jackson [8]                          |
| 2001 | 3  | 23 | 32.98 | 46.64 | 337<br>121 | 10<br>82 | 126<br>84  | 7     | 5.2 | TF     | 36                | 2.84           | Nissen, <i>et al.</i> [11]                        |
| 2001 | 4  | 3  | 32.55 | 48.02 | 110<br>281 | 38<br>52 | 97<br>85   | 9     | 4.9 | TF     | 15                | 2.15           | Nissen, Tatar, Jackson and Allen [11]             |
| 2002 | 2  | 17 | 28.08 | 51.79 | 288<br>126 | 68<br>23 | 83<br>107  | 6     | 5.3 | TF     | 23                | 2.48           | Adams, Brazier, Nyblade, Rodgers and Al-Amri [10] |
| 2002 | 9  | 25 | 32.06 | 49.32 | 142<br>310 | 47<br>44 | 98<br>82   | 8     | 5.3 | TF     | 46                | 2.05           | Nissen, Tatar, Jackson and Allen [11]             |
| 2008 | 8  | 27 | 32.31 | 47.35 | 338<br>248 | 88<br>78 | -168<br>-2 | 10    | 5.6 | SS     | 22                | 1.40           | Nissen, Tatar, Jackson and Allen [11]             |
| 2010 | 9  | 27 | 29.67 | 51.66 | 280<br>119 | 13<br>78 | 71<br>94   | 16    | 5.6 | TF     | 26                | 2.71           | Nissen, Tatar, Jackson and Allen [11]             |
| 2012 | 5  | 3  | 32.74 | 47.61 | 299<br>97  | 44<br>48 | 106<br>75  | 10    | 5.3 | TF     | 18                | 2.07           | IRCS <sup>1</sup>                                 |
| 2012 | 7  | 1  | 31.81 | 51.02 | 89<br>250  | 38<br>53 | 105<br>79  | 6.3   | 5   | TF     | 168               | 2.12           | IRCS                                              |
| 2012 | 7  | 24 | 31.84 | 51.02 | 86<br>253  | 34<br>57 | 101<br>83  | 10    | 4.9 | TF     | 168               | 2.21           | IRCS                                              |
| 2012 | 10 | 10 | 29.33 | 52.49 | 311<br>98  | 60<br>35 | 108<br>62  | 8.8   | 4.7 | TF     | 28                | 2.28           | IRCS                                              |
| 2013 | 1  | 12 | 31.90 | 51.09 | 77<br>300  | 26<br>71 | 50<br>107  | 5     | 4.9 | TF     | 17                | 2.55           | IRCS                                              |
| 2013 | 4  | 9  | 28.47 | 51.57 | 151<br>317 | 39<br>52 | 101<br>81  | 11.3  | 6.3 | TF     | 53                | 2.10           | IRCS                                              |
| 2013 | 4  | 9  | 28.46 | 51.56 | 147<br>330 | 45<br>45 | 88<br>92   | 11.1  | 5.3 | TF     | 58                | 2.25           | IRCS                                              |
| 2013 | 4  | 9  | 28.49 | 51.58 | 163<br>313 | 55<br>39 | 109<br>65  | 20    | 4.5 | TF     | 60                | 2.17           | IRCS                                              |
| 2013 | 4  | 9  | 28.42 | 51.67 | 160<br>329 | 53<br>37 | 96<br>82   | 20    | 4.6 | TF     | 66                | 2.01           | IRCS                                              |
| 2013 | 4  | 10 | 28.34 | 51.64 | 332<br>63  | 84<br>77 | 167<br>6   | 20    | 4.6 | SS     | 17                | 1.72           | IRCS                                              |

<sup>1</sup> Iranian Seismological Center ([www.irsc.ut.ac.ir](http://www.irsc.ut.ac.ir))

| Date |    |    | Lat.  | Lon.  | Strike     | Dip      | Rake      | Depth | Mw  | Regime | S <sub>Hmax</sub> | A <sub>φ</sub> | Reference |
|------|----|----|-------|-------|------------|----------|-----------|-------|-----|--------|-------------------|----------------|-----------|
| 2013 | 4  | 10 | 28.40 | 51.64 | 145<br>304 | 38<br>54 | 107<br>77 | 20    | 5.5 | TF     | 43                | 2.16           | IRCS      |
| 2013 | 4  | 10 | 28.26 | 51.69 | 311<br>109 | 58<br>34 | 102<br>72 | 10    | 5.2 | TF     | 32                | 2.28           | IRCS      |
| 2013 | 4  | 10 | 28.41 | 51.65 | 161<br>315 | 53<br>40 | 106<br>69 | 20    | 5.2 | TF     | 60                | 2.09           | IRCS      |
| 2013 | 4  | 10 | 28.42 | 51.64 | 338<br>69  | 85<br>74 | 164<br>5  | 13.7  | 4.5 | SS     | 23                | 1.64           | IRCS      |
| 2013 | 4  | 10 | 28.24 | 51.79 | 317<br>114 | 57<br>35 | 103<br>71 | 16.6  | 4.4 | TF     | 38                | 2.21           | IRCS      |
| 2013 | 4  | 11 | 28.44 | 51.55 | 151<br>326 | 47<br>43 | 93<br>87  | 20    | 4.9 | TF     | 59                | 2.11           | IRCS      |
| 2013 | 4  | 19 | 32.78 | 51.81 | 94         | 62       | 49        | 10    | 4   | TF     | 32                | 2.20           | IRCS      |
| 2013 | 4  | 24 | 28.44 | 51.55 | 138<br>331 | 42<br>49 | 80<br>99  | 13.7  | 4.5 | TF     | 55                | 2.05           | IRCS      |
| 2013 | 5  | 1  | 28.32 | 51.71 | 309<br>110 | 54<br>37 | 101<br>75 | 20    | 4.9 | TF     | 31                | 2.16           | IRCS      |
| 2013 | 5  | 2  | 28.25 | 51.76 | 319<br>107 | 51<br>43 | 111<br>66 | 16    | 4.7 | TF     | 34                | 2.08           | IRCS      |
| 2013 | 5  | 6  | 28.52 | 51.67 | 153<br>305 | 57<br>36 | 107<br>66 | 20    | 4.9 | TF     | 51                | 2.26           | IRCS      |
| 2013 | 5  | 12 | 29.55 | 52.70 | 274<br>113 | 36<br>56 | 74<br>101 | 10    | 4.3 | TF     | 15                | 2.22           | IRCS      |
| 2013 | 5  | 13 | 28.41 | 51.69 | 281<br>180 | 53<br>76 | 18<br>141 | 10    | 4.6 | SS     | 55                | 1.75           | IRCS      |
| 2013 | 8  | 10 | 28.42 | 51.69 | 183<br>284 | 67<br>66 | 154<br>25 | 17.2  | 4.5 | SS     | 54                | 1.99           | IRCS      |
| 2013 | 8  | 10 | 28.40 | 51.69 | 176<br>321 | 55<br>41 | 112<br>62 | 14.2  | 4.6 | TF     | 71                | 2.12           | IRCS      |
| 2013 | 8  | 14 | 30.83 | 50.47 | 307<br>128 | 24<br>66 | 89<br>90  | 7.1   | 4.2 | TF     | 38                | 2.17           | IRCS      |
| 2013 | 11 | 19 | 28.57 | 51.55 | 155<br>266 | 60<br>58 | 143<br>37 | 10    | 4.2 | TF     | 31                | 2.03           | IRCS      |
| 2013 | 11 | 28 | 29.32 | 51.31 | 118<br>357 | 70<br>36 | 60<br>144 | 7.8   | 5.6 | TF     | 50                | 2.47           | IRCS      |
| 2013 | 11 | 28 | 29.29 | 51.32 | 31<br>122  | 88<br>73 | 163<br>2  | 10    | 4.2 | SS     | 75                | 1.53           | IRCS      |

| Date |   |    | Lat.  | Lon.  | Strike     | Dip      | Rake        | Depth | Mw  | Regime | S <sub>Hmax</sub> | A <sub>φ</sub> | Reference |
|------|---|----|-------|-------|------------|----------|-------------|-------|-----|--------|-------------------|----------------|-----------|
| 2014 | 1 | 28 | 32.53 | 50.01 | 197<br>291 | 63<br>84 | -7<br>-153  | 6     | 4.6 | SS     | 151               | 1.34           | IRCS      |
| 2014 | 4 | 16 | 28.55 | 51.61 | 191<br>282 | 86<br>83 | 173<br>4    | 14.9  | 4.8 | SS     | 56                | 1.78           | IRCS      |
| 2014 | 5 | 21 | 29.60 | 50.86 | 126<br>306 | 57<br>33 | 90<br>90    | 19    | 5.2 | TF     | 36                | 2.34           | IRCS      |
| 2014 | 5 | 21 | 29.63 | 50.86 | 125<br>315 | 64<br>27 | 86<br>99    | 15    | 4.9 | TF     | 38                | 2.34           | IRCS      |
| 2014 | 6 | 20 | 29.88 | 50.89 | 100<br>338 | 50<br>58 | 44<br>131   | 11    | 4.5 | TF     | 41                | 2.09           | IRCS      |
| 2014 | 8 | 15 | 28.49 | 51.68 | 276<br>7   | 87<br>69 | -21<br>-177 | 10    | 4.6 | SS     | 53                | 1.41           | IRCS      |
| 2014 | 8 | 17 | 32.72 | 47.70 | 114<br>302 | 73<br>17 | 88<br>98    | 7.5   | 4.5 | TF     | 26                | 2.66           | IRCS      |
| 2014 | 8 | 17 | 32.74 | 47.64 | 115<br>299 | 72<br>18 | 89<br>94    | 9     | 4.6 | TF     | 26                | 2.62           | IRCS      |
| 2014 | 8 | 18 | 32.71 | 47.64 | 104<br>320 | 63<br>32 | 72<br>121   | 10    | 6.2 | TF     | 27                | 2.34           | IRCS      |
| 2014 | 8 | 18 | 32.76 | 47.51 | 113<br>297 | 70<br>20 | 89<br>94    | 12    | 4.7 | TF     | 24                | 2.53           | IRCS      |
| 2014 | 8 | 18 | 32.72 | 47.69 | 98<br>332  | 59<br>45 | 55<br>134   | 12    | 5.7 | TF     | 32                | 2.17           | IRCS      |
| 2014 | 8 | 18 | 32.76 | 47.60 | 313<br>111 | 49<br>43 | 105<br>74   | 10    | 4.7 | TF     | 32                | 2.10           | IRCS      |
| 2014 | 8 | 18 | 32.64 | 47.63 | 102<br>323 | 38<br>59 | 56<br>113   | 8     | 4.6 | TF     | 36                | 2.24           | IRCS      |
| 2014 | 8 | 18 | 32.73 | 47.60 | 293<br>97  | 47<br>44 | 101<br>78   | 15    | 5.1 | TF     | 15                | 2.05           | IRCS      |
| 2014 | 8 | 18 | 32.73 | 47.53 | 75<br>325  | 42<br>73 | 25<br>129   | 7.4   | 5.4 | TF     | 28                | 2.48           | IRCS      |
| 2014 | 8 | 18 | 32.58 | 47.61 | 305<br>97  | 52<br>42 | 109<br>68   | 17.2  | 5.9 | TF     | 22                | 2.11           | IRCS      |
| 2014 | 8 | 18 | 32.71 | 47.60 | 283<br>124 | 41<br>51 | 74<br>104   | 12.2  | 4.6 | TF     | 24                | 2.13           | IRCS      |
| 2014 | 8 | 18 | 32.71 | 47.56 | 126<br>333 | 30<br>63 | 65<br>103   | 8.9   | 4.6 | TF     | 54                | 2.33           | IRCS      |
| 2014 | 8 | 19 | 32.74 | 47.53 | 105        | 46       | 74          | 7.8   | 5.2 | TF     | 26                | 2.00           | IRCS      |

| Date |    |    | Lat.  | Lon.  | Strike     | Dip      | Rake        | Depth | Mw  | Regime | S <sub>Hmax</sub> | A <sub>φ</sub> | Reference |
|------|----|----|-------|-------|------------|----------|-------------|-------|-----|--------|-------------------|----------------|-----------|
|      |    |    |       |       | 307        | 46       | 105         |       |     |        |                   |                |           |
| 2014 | 8  | 20 | 32.64 | 47.74 | 115<br>305 | 77<br>13 | 88<br>99    | 17.7  | 5.6 | TF     | 27                | 2.75           | IRCS      |
| 2014 | 8  | 22 | 32.73 | 47.62 | 133<br>271 | 74<br>22 | 104<br>50   | 16    | 4.6 | TF     | 32                | 2.62           | IRCS      |
| 2014 | 8  | 23 | 32.72 | 47.77 | 105<br>344 | 61<br>47 | 51<br>139   | 20    | 5.3 | TF     | 42                | 2.20           | IRCS      |
| 2014 | 8  | 24 | 32.68 | 47.79 | 146<br>55  | 88<br>68 | -158<br>-2  | 19.4  | 4.9 | SS     | 8                 | 1.41           | IRCS      |
| 2014 | 8  | 25 | 32.74 | 47.71 | 124<br>292 | 75<br>15 | 93<br>78    | 12    | 4.7 | TF     | 32                | 2.60           | IRCS      |
| 2014 | 10 | 15 | 32.58 | 47.79 | 95<br>273  | 32<br>58 | 92<br>89    | 10    | 5.8 | TF     | 4                 | 2.44           | IRCS      |
| 2014 | 10 | 15 | 32.51 | 47.92 | 78<br>313  | 66<br>38 | 59<br>139   | 12.2  | 4.4 | TF     | 10                | 2.38           | IRCS      |
| 2014 | 10 | 16 | 32.78 | 47.81 | 123<br>306 | 52<br>38 | 88<br>92    | 13.7  | 4.1 | TF     | 34                | 2.07           | IRCS      |
| 2014 | 12 | 12 | 30.47 | 50.48 | 314<br>132 | 19<br>71 | 92<br>89    | 17.7  | 4.9 | TF     | 42                | 2.11           | IRCS      |
| 2014 | 12 | 30 | 28.73 | 51.89 | 205<br>340 | 26<br>71 | 132<br>72   | 11    | 5   | TF     | 84                | 2.56           | IRCS      |
| 2015 | 1  | 1  | 28.73 | 51.85 | 235<br>6   | 18<br>78 | 137<br>77   | 10.1  | 4.5 | TF     | 108               | 2.76           | IRCS      |
| 2015 | 1  | 10 | 28.75 | 51.84 | 215<br>125 | 90<br>74 | -164<br>0   | 10    | 4.6 | SS     | 79                | 1.48           | IRCS      |
| 2015 | 1  | 14 | 32.84 | 46.93 | 300<br>121 | 18<br>72 | 90<br>90    | 15    | 4.3 | TF     | 30                | 2.90           | IRCS      |
| 2015 | 2  | 15 | 32.78 | 46.84 | 125<br>276 | 71<br>21 | 100<br>63   | 8     | 4.9 | TF     | 27                | 2.59           | IRCS      |
| 2015 | 4  | 10 | 28.35 | 51.83 | 59<br>150  | 87<br>69 | -21<br>-176 | 8.5   | 4.6 | SS     | 16                | 1.41           | IRCS      |
| 2015 | 5  | 21 | 33.44 | 48.39 | 72<br>318  | 64<br>51 | 45<br>146   | 8     | 4.3 | TF     | 12                | 2.19           | IRCS      |
| 2015 | 9  | 25 | 32.85 | 46.53 | 132<br>321 | 63<br>27 | 86<br>98    | 17    | 5.1 | TF     | 45                | 2.38           | IRCS      |
| 2015 | 11 | 25 | 31.89 | 49.54 | 312<br>130 | 3<br>85  | 92<br>90    | 12    | 5.2 | TF     | 0                 | 3.00           | IRCS      |

| Date |    |    | Lat.  | Lon.  | Strike     | Dip      | Rake        | Depth | Mw  | Regime | S <sub>Hmax</sub> | A <sub>φ</sub> | Reference |
|------|----|----|-------|-------|------------|----------|-------------|-------|-----|--------|-------------------|----------------|-----------|
| 2015 | 12 | 4  | 28.91 | 52.02 | 118<br>338 | 83<br>9  | 84<br>130   | 22    | 4.7 | TF     | 0                 | 2.96           | IRCS      |
| 2016 | 3  | 31 | 31.93 | 50.82 | 333<br>66  | 69<br>81 | 170<br>21   | 8     | 5   | SS     | 18                | 1.73           | IRCS      |
| 2016 | 9  | 23 | 30.60 | 50.38 | 141<br>336 | 74<br>17 | 86<br>104   | 18    | 4.5 | TF     | 54                | 2.60           | IRCS      |
| 2016 | 9  | 30 | 32.45 | 48.95 | 98<br>283  | 61<br>29 | 88<br>94    | 15    | 4   | TF     | 9                 | 2.04           | IRCS      |
| 2016 | 10 | 14 | 31.09 | 50.07 | 120<br>2   | 77<br>26 | 67<br>150   | 10    | 4.5 | TF     | 48                | 2.69           | IRCS      |
| 2017 | 1  | 17 | 29.66 | 51.50 | 166<br>75  | 76<br>86 | -176<br>-14 | 9     | 4.6 | SS     | 31                | 1.35           | IRCS      |
| 2017 | 9  | 3  | 29.06 | 51.66 | 144<br>305 | 41<br>51 | 104<br>78   | 9     | 4.9 | TF     | 44.00             | 2.13           | IRCS      |

## References

1. Sherkati, S.; Letouzey, J. Variation of structural style and basin evolution in the central Zagros (Izeh zone and Dezful Embayment), Iran. *Marine and Petroleum Geology* **2004**, *21*, 535–554, doi:10.1016/j.marpetgeo.2004.01.007.
2. Najibi, A.R.; Ghafoori, M.; Lashkaripour, G.R.; Asef, M.R. Empirical relations between strength and static and dynamic elastic properties of Asmari and Sarvak limestones, two main oil reservoirs in Iran. *Journal of Petroleum Science and Engineering* **2015**, *126*, 78-82.
3. Baker, C.; Jackson, J.; Priestley, K. Earthquakes on the Kazerun Line in the Zagros Mountains of Iran: strike-slip faulting within a fold-and-thrust belt. *Geophysical Journal International* **1993**, *115*, 41-61.
4. Ni, J.; Barazangi, M. Seismotectonics of the Zagros continental collision zone and a comparison with the Himalayas. *Journal of Geophysical Research: Solid Earth* **1986**, *91*, 8205-8218.
5. Jackson, J.; McKenzie, D. Active tectonics of the Alpine—Himalayan Belt between western Turkey and Pakistan. *Geophysical Journal International* **1984**, *77*, 185-264.
6. Maggi, A.; Jackson, J.; Priestley, K.; Baker, C. A re-assessment of focal depth distributions in southern Iran, the Tien Shan and northern India: Do earthquakes really occur in the continental mantle? *Geophysical Journal International* **2000**, *143*, 629-661.
7. Jackson, J.; Fitch, T. Basement faulting and the focal depths of the larger earthquakes in the Zagros mountains (Iran). *Geophysical Journal International* **1981**, *64*, 561-586, doi:10.1111/j.1365-246X.1981.tb02685.x.



8. Talebian, M.; Jackson, J. A reappraisal of earthquake focal mechanisms and active shortening in the Zagros mountains of Iran. *Geophysical Journal International* **2004**, *156*, 506-526, doi:10.1111/j.1365-246X.2004.02092.x.
9. Priestley, K.; Baker, C.; Jackson, J. Implications of earthquake focal mechanism data for the active tectonics of the South Caspian Basin and surrounding regions. *Geophysical Journal International* **1994**, *118*, 111-141.
10. Adams, A.; Brazier, R.; Nyblade, A.; Rodgers, A.; Al-Amri, A. Source parameters for moderate earthquakes in the Zagros Mountains with implications for the depth extent of seismicity. *Bulletin of the Seismological Society of America* **2009**, *99*, 2044-2049.
11. Nissen, E.; Tatar, M.; Jackson, J.A.; Allen, M.B. New views on earthquake faulting in the Zagros fold-and-thrust belt of Iran. *Geophysical Journal International* **2011**, *186*, 928-944.
